# Supplementary material
Source: PubMed Central journal article supplement (PMC2919115)
Supplement: supp_M110.142059_SupplementalMaterials.pdf [file supp_M110.142059_SupplementalMaterials.pdf]

*Supplemental Table 1.* Primers used for quantitative and semi-quantitative RT-PCR.

| Primer  | Sequence             |
|---------|----------------------|
| Oct4 F  | CCAGAAGGGCAAAAGATCAA |
| Oct4 R  | GCTCCTGATCAACAGCATCA |
| Sox2 F  | ACCAGCTCGCAGACCTACAT |
| Sox2 R  | CCCTCCCAATTCCCTTGTAT |
| Nanog F | AAGTACCTCAGCCTCCAGCA |
| Nanog R | GAAGTTATGGAGCGGAGCAG |
| Fbx15 F | ACATTGCCTCCCGACACTAC |
| Fbx15 R | GAAGGCAGGCAGATCTCAAG |
| Utf1 F  | CGTCGCTACAAGTTCCTCAA |
| Utf1 R  | CAGAGTGTCGGTGCTCGTAA |
| Gapdh F | CATGGCCTTCCGTGTTCTTA |
| Gapdh R | GCCTGCTTCACCACCTTCTT |
| Mreg F  | GCGGCAGATCCGCAGGGAAG |
| Mreg R  | CTCCCAGCTGGCGGGGAAGA |
| Krt12 F | GGCTCGCTGGCTGAAACCGA |
| Krt12 R | CTCCAGGCGAGCCTTGACGC |
| Bex1 F  | TTCGGCAGCCCATCGCTCAC |
| Bex1 R  | CGGGTCAGTGCTAACCGCCC |

**Supplemental Table 2.** Probes of ES cell-enriched genes that are 2-fold up-regulated by butyrate in 4F reprogramming, 3F reprogramming and both.

| Probe ID                                            | Gene Symbol   | Gene Name                                               |
|-----------------------------------------------------|---------------|---------------------------------------------------------|
| <i>Up-regulated only in 4F reprogramming</i>        |               |                                                         |
| 1432466_a_at                                        | ApoE          | apolipoprotein E                                        |
| 1418687_at                                          | Arc           | activity regulated cytoskeletal-associated protein      |
| 1448595_a_at                                        | Bex1          | brain expressed gene 1                                  |
| 1449887_at                                          | Chmp4c        | chromatin modifying protein 4C                          |
| 1418709_at                                          | Cox7a1        | cytochrome c oxidase, subunit VIIa 1                    |
| 1434170_at                                          | Dcaf12l1      | DDB1 and CUL4 associated factor 12-like 1               |
| 1416579_a_at                                        | Epcam         | epithelial cell adhesion molecule                       |
| 1417883_at                                          | Gstt2         | glutathione S-transferase, theta 2                      |
| 1449074_at                                          | Kcnk4         | potassium channel, subfamily K, member 4                |
| 1419230_at                                          | Krt12         | keratin 12                                              |
| 1457314_at                                          | L1td1         | LINE-1 type transposase domain containing 1             |
| 1416236_a_at                                        | Mpzl2         | myelin protein zero-like 2                              |
| 1448265_x_at                                        | Mpzl2         | myelin protein zero-like 2                              |
| 1437250_at                                          | Mreg          | melanoregulin                                           |
| 1429013_at                                          | Mtap7d2       | MAP7 domain containing 2                                |
| 1438820_at                                          | Rnf17         | ring finger protein 17                                  |
| 1416627_at                                          | Spint1        | serine protease inhibitor, Kunitz type 1                |
| 1448562_at                                          | Upp1          | uridine phosphorylase 1                                 |
| 1431786_s_at                                        | 1190003J15Rik | RIKEN cDNA 1190003J15 gene                              |
| 1417797_a_at                                        | 1810019J16Rik | RIKEN cDNA 1810019J16 gene                              |
| 1455918_at                                          |               |                                                         |
| <i>Up-regulated only in 3F reprogramming</i>        |               |                                                         |
| 1434073_at                                          | Gprasp2       | G protein-coupled receptor associated sorting protein 2 |
| 1426617_a_at                                        | Ttyh1         | tweety homolog 1 (Drosophila)                           |
| <i>Up-regulated in both 4F and 3F reprogramming</i> |               |                                                         |
| 1428209_at                                          | Bex4          | brain expressed gene 4                                  |
| 1452004_at                                          | Calca         | calcitonin/calcitonin-related polypeptide, alpha        |
| 1442273_at                                          | Ccdc158       | coiled-coil domain containing 158                       |
| 1417590_at                                          | Cyp27a1       | cytochrome P450, family 27, subfamily a, polypeptide 1  |
| 1460454_at                                          | Glod5         | glyoxalase domain containing 5                          |
| 1430238_at                                          | Got1l1        | glutamic-oxaloacetic transaminase 1-like 1              |
| 1434670_at                                          | Kif5a         | kinesin family member 5A                                |
| 1426255_at                                          | Nefl          | neurofilament, light polypeptide                        |
| 1416965_at                                          | Pcsk1n        | proprotein convertase subtilisin/kexin type 1 inhibitor |
| 1434292_at                                          | Snhg11        | small nucleolar RNA host gene 11 (non-protein coding)   |
| 1417426_at                                          | Srgn          | serglycin                                               |
| 1421606_a_at                                        | Sult4a1       | sulfotransferase family 4A, member 1                    |
| 1419289_a_at                                        | Syngn1        | synaptogyrin 1                                          |

|              |       |                                  |
|--------------|-------|----------------------------------|
| 1418743_a_at | Tesc  | tescalcin                        |
| 1418744_s_at | Tesc  | tescalcin                        |
| 1424351_at   | Wfdc2 | WAP four-disulfide core domain 2 |

---

**Supplemental Fig. 1.** Expression of butyrate up-regulated genes in response to different concentrations of butyrate. Total RNA samples harvested 2 days after mock or butyrate treatment (0.25 mM, 0.5 mM and 1 mM) were subjected to RT-qPCR using primers specific for *Bex1*, *Mreg* and *Krt12*.

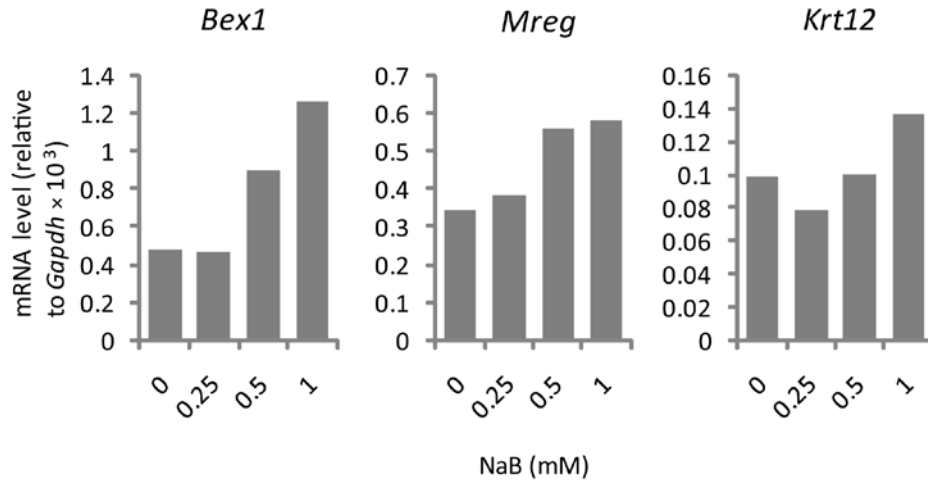



### Supplemental Methods

*Western blotting*- Cell populations were collected at day 2 post-infection and lysed with RIPA buffer (150 mM NaCl, 50 mM Tris, pH7.5, 1% NP40, 0.05% Na-deoxycholate, 1 mM Na<sub>3</sub>VO<sub>4</sub> and 1 mM NaF) for 1 h at 4°C. Soluble fraction, as total protein extract, was isolated by centrifugation and then subjected to electrophoresis. Western blotting was performed with antibodies against p53 (Santa Cruz, sc6243), p21 (Santa Cruz, sc52870), Ink4a (Santa Cruz, sc1207), Arf (Santa Cruz, sc32748) and  $\alpha$ -tubulin (Sigma, T6199).
